# Supplementary material
Source: PubMed Central journal article supplement (PMC5047095)
Supplement: supp_pp.16.00831_PP2016-00831R1_Supplemental_Material.pdf [file supp_pp.16.00831_PP2016-00831R1_Supplemental_Material.pdf]

1 Supplemental Data

2 Supplemental Figure S1.

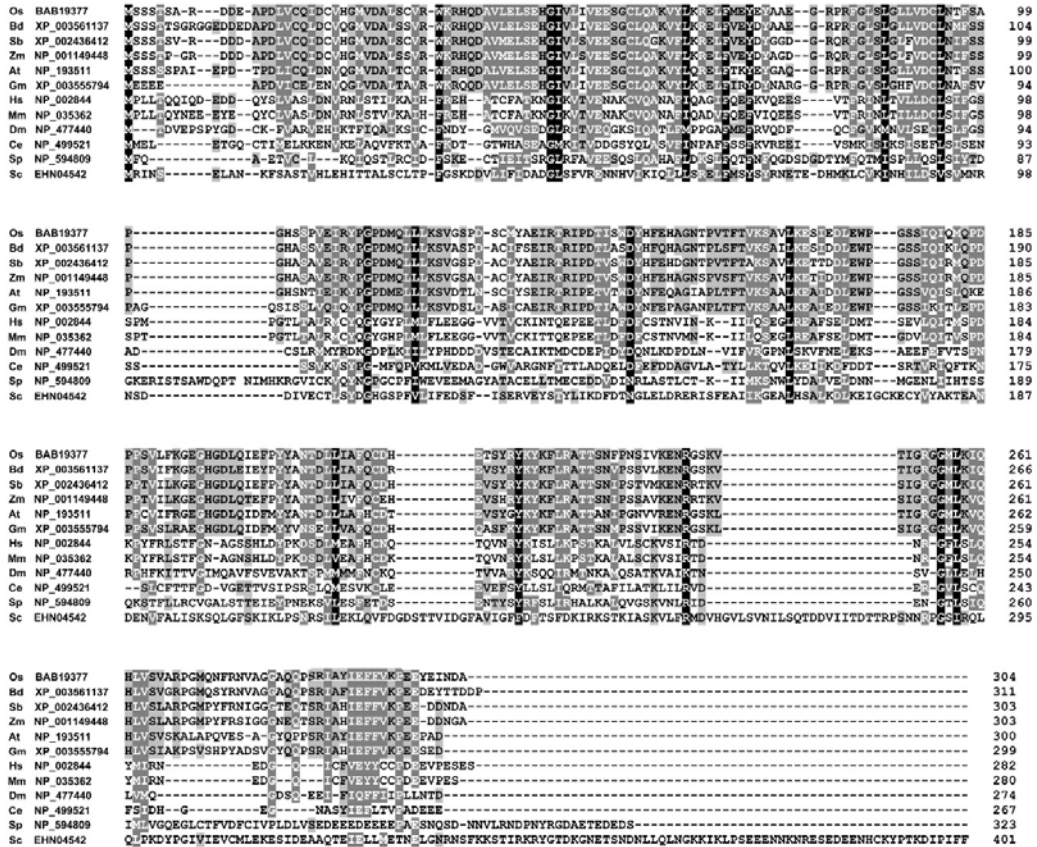

3

4 Supplemental Figure S1. Multiple sequence alignment of OsRAD1 homologs. Os, *Oryza sativa*;

5 Bd, *Brachypodium distachyon*; Sb, *Sorghum bicolor*; Zm, *Zea mays*; At, *Arabidopsis thaliana*;

6 Gm, *Glycine max*; Hs, *Homo sapiens*; Mm, *Mus musculus*; Dm, *Drosophila melanogaster*; Ce,

7 *Caenorhabditis elegans*; Sp, *Schizosaccharomyces pombe*; Sc, *Saccharomyces cerevisiae*.

8 Identical amino acids are shaded in black. Similar amino acids are shaded in gray.

9

10 **Supplemental Figure S2.**

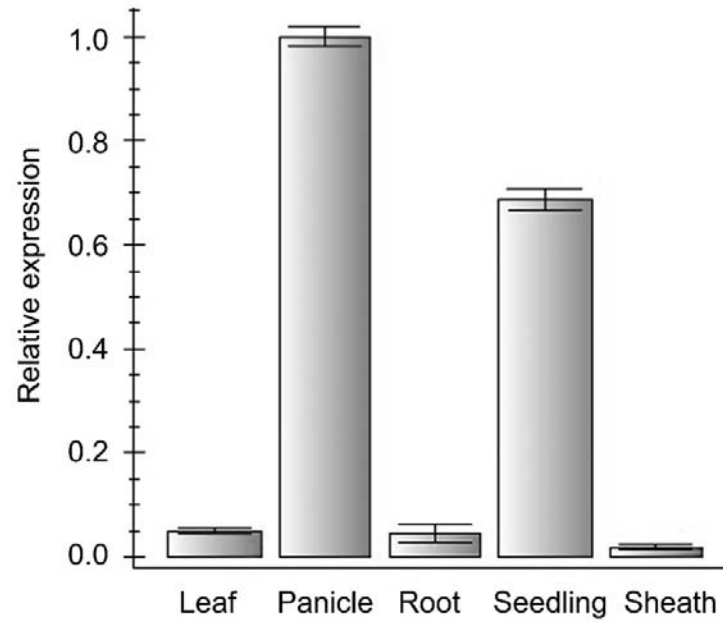

11 **Supplemental Figure S2.** Expression analysis of *OsRAD1* in leaf, young panicle, sheath, root and  
12 seedling by Real-Time QPCR. The error bar represents the SE of mean values in three biological  
13 replicates.

14

15

16

17

18

19

20

21

22

23 **Supplemental Figure S3**

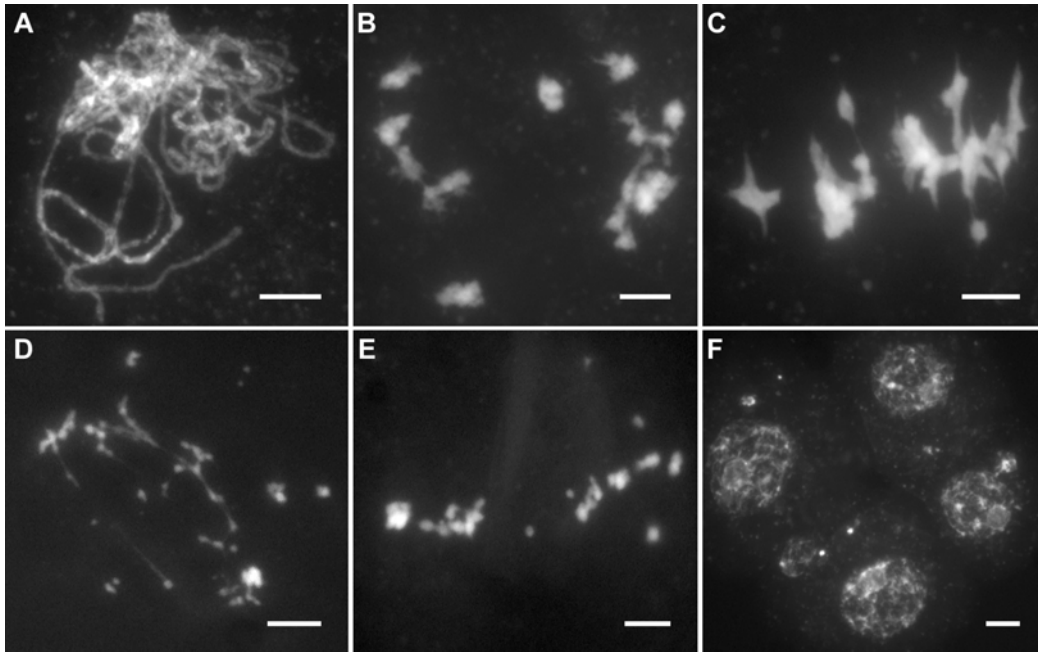

25 **Supplemental Figure S3.** Meiotic defects in *Osradi-2*. (A) Pachytene. (B) Diakinesis. (C)  
26 Metaphase I. (D) Anaphase I. (E) Metaphase II. (F) Tetrad. Bars = 5µm.

27

28 **Supplemental Figure S4**

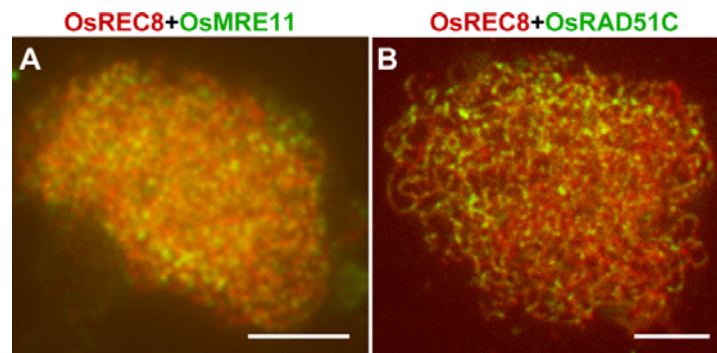

30 **Supplemental Figure S4.** Localization of OsMRE11 and OsRAD51C in *Osradi-2*. (A)  
31 Immunostaining of the *Osradi-2* mutant for OsREC8 and OsMRE11. (B) Immunostaining of the  
32 *Osradi-2* mutant for OsREC8 and OsRAD51C. Bars = 5µm.

33

34

35 **Supplemental Figure S5**

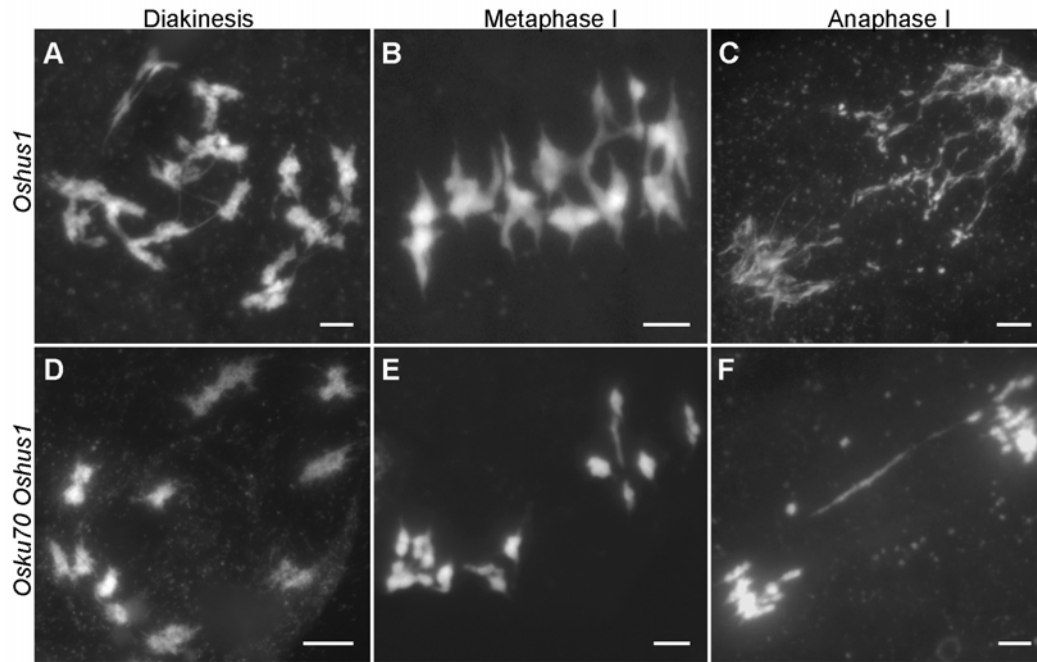

36

37 **Supplemental Figure S5.** Genetic analysis of *OshUS1* with *OsKU70*. (A) to (C) *Oshus1*  
38 mutation leads to ectopic chromosome associations during meiosis. (D) to (F) Loss of *OsKU70*  
39 partially rescues the meiotic defects of *Oshus1*. Bars = 5 $\mu$ m.

40

41

42

43

44

45

46

47

48

49

50 **Supplemental Figure S6**

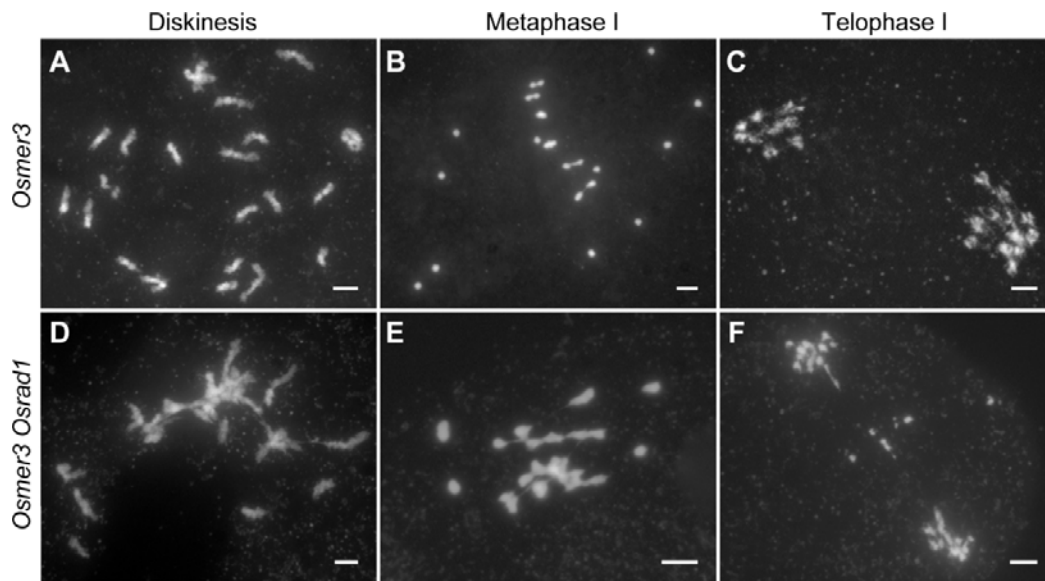

51

52 **Supplemental Figure S6.** Chromosome behaviors in *Osmer3* and *Osmer3 Osrad1*. (A) to (C)

53 Meiotic chromosomes in *Osmer3*. (D) to (F) Ectopic chromosome associations occur in the

54 *Osmer3 Osrad1* double mutant. Bars = 5 $\mu$ m.

55

56

57 **Supplemental Table S1. Markers used in Map-based Cloning**

| Name | Primer | Sequence(5'-3')        |
|------|--------|------------------------|
| M1   | F      | GTGTGGCTTGGCTACTGATT   |
|      | R      | CGGGGCACGCTTTGAGTTGT   |
| P1   | F      | GGCCTAGGGGCCTAAAGAAAAC |
|      | R      | GTCCACCTGTCCGTGCGTATCA |
| P2   | F      | CATTTATTCTAGATATTGTG   |
|      | R      | GTGATTCTCTCTTGATCATC   |

58

59 **Supplemental Table S2. Primers for RACE, RT -PCR, and Plasmid Construction**

| Name          | Sequence(5'-3')                            |
|---------------|--------------------------------------------|
| Adaptor-T(18) | CTGATCTAGAGGTACCGGATCCTTTTTTTTTTTTTTTTTTTT |
| R3-1          | TCTTCGTGCAACAACCTTCG                       |
| R3-2          | CCCAAACAGTATTGTGAAGG                       |
| RO-F          | ATGAGCTCGTCGACGTCCGC                       |
| RO-R          | CTACGCATCATTATCTCAT                        |
| RAD1RT-F      | CAGGTTCCAGCATTGAGATTC                      |
| RAD1RT-R      | TGTTTCATGGTCACATTGGAATG                    |
| Actin-F       | CTGACAGGATGAGCAAGGAG                       |
| Actin-R       | GGCAATCCACATCTGCTGGA                       |

60

61

62

63

64
